# Supplementary material
Source: PubMed Central journal article supplement (PMC7313350)
Supplement: DS_10.1177_0022034520912188.pdf [file DS_10.1177_0022034520912188.pdf]

## Single-Cell Analysis of the Periodontal Immune Niche in Type 2 Diabetes

A.C. Belkina, M. Azer, J.J. Lee, H.H. Elgaali, R. Pihl, M. Cleveland, J. Carr, S. Kim, C. Habib, H. Hasturk, J.E. Snyder-Cappione, and B.S. Nikolajczyk

### Appendix

**Table S1:** Flow cytometry antibody dilutions and clone information

| Master mix staining solution | Dilution | Clone information | Vendor         |
|------------------------------|----------|-------------------|----------------|
| CD19 BUV395                  | 1:100    | SJ25C1            | BD Biosciences |
| CD45 PacB                    | 1:200    | 2H7               | Biolegend      |
| CD20 FITC                    | 1:200    | 2H7               | Biolegend      |
| CD16 PE                      | 1:200    | 3G8               | Biolegend      |
| CD8 PerCP/Cy5.5              | 1:400    | SK1               | Biolegend      |
| CD11b PE/Cy7                 | 1:200    | M1/70             | Biolegend      |
| CD4 APC                      | 1:200    | OKT4              | Biolegend      |
| CD56 AF700                   | 1:100    | HCD56             | Biolegend      |
| CD3 APC/Cy7                  | 1:200    | OKT3              | Biolegend      |

**Table S2:** Primary and secondary antibody concentrations for ELISPOT plate

| Antibody pair | Primary added to 500ul PBS (ul) | Secondary added to 500ul PBSTB (ul) | Vendor/Catalog information |
|---------------|---------------------------------|-------------------------------------|----------------------------|
| IL-2          | 8.5                             | 8.5                                 | R&D SEL202                 |
| IL-4          | 7.5                             | 0.5                                 | MABTECH 3410-3-1000        |
| IL-6          | 7.5                             | 0.5                                 | MABTECH 3460-3-1000        |
| IL-8          | 8.5                             | 8.5                                 | R&D SEL208                 |
| IL-10         | 8.5                             | 8.5                                 | R&D SEL217B                |
| IL-17A        | 10.0                            | 2.0                                 | eBioscience 14-7178-85     |
| IFN- $\gamma$ | 7.5                             | 0.5                                 | R&D SEL210                 |
| TNF- $\alpha$ | 8.5                             | 8.5                                 | MABTECH 3420-3-1000        |
